# Supplementary material
Source: MDPI journal article supplement (https://www.mdpi.com/search?q=molecules-25-00463)
Supplement: s001 [file molecules-25-00463-s001.pdf]

# Evaluation of a $^{68}\text{Ga}$ -labelled DOTA-tetrazine as a PET alternative to $^{111}\text{In}$ -SPECT pretargeted imaging

Patricia E. Edem <sup>1,2,3,†</sup>, Jesper T. Jørgensen <sup>1,2,†</sup>, Kamilla Nørregaard <sup>1,2</sup>, Raffaella Rossin <sup>4</sup>, Abdolreza Yazdani <sup>5,6</sup>, John F. Valliant <sup>5</sup>, Marc Robillard <sup>4</sup>, Matthias M. Herth <sup>1,3,\*</sup>, and Andreas Kjaer <sup>1,2,\*</sup>

- <sup>1</sup> Department of Clinical Physiology, Nuclear Medicine & PET, Rigshospitalet, Blegdamsvej 9, 2100 Copenhagen, Denmark; patredem@gmail.com (P.E.E.); jespertj@sund.ku.dk (J.T.J.); kamilla.noerregaard@gmail.com (K.N.); matthias.herth@sund.ku.dk (M.M.H.); akjaer@sund.ku.dk (A.K.)
  - <sup>2</sup> Cluster for Molecular Imaging, Department of Biomedical Sciences, University of Copenhagen, Blegdamsvej 3, 2200 Copenhagen, Denmark
  - <sup>3</sup> Department of Drug Design and Pharmacology, University of Copenhagen, Jagtvej 162, 2100 Copenhagen, Denmark
  - <sup>4</sup> Tagworks Pharmaceuticals, Geert Grooteplein Zuid 10, 6525 GA Nijmegen, The Netherlands; raffaella.rossin@tagworkspharma.com (R.R.); marc.robillard@tagworkspharma.com (M.R.)
  - <sup>5</sup> Department of Chemistry and Chemical Biology, McMaster University, 1280 Main St West, Hamilton, ON L8S 4M1, Canada; ayazdani.mcmaster@gmail.com (A.Y.); valliant@mcmaster.ca (J.F.V.)
  - <sup>6</sup> Pharmaceutical Chemistry and Radiopharmacy Department, School of Pharmacy, Shahid Beheshti University of Medical Sciences, PO Box 14155–6153, Tehran, Iran
- \* Correspondence: akjaer@sund.ku.dk (A.K.); matthias.herth@sund.ku.dk (M.H.)  
 † Patricia E. Edem and Jesper T. Jørgensen contributed equally to this work.

Academic editor: Anne Roivainen and Xiang-Guo Li

## Chromatographic Analysis

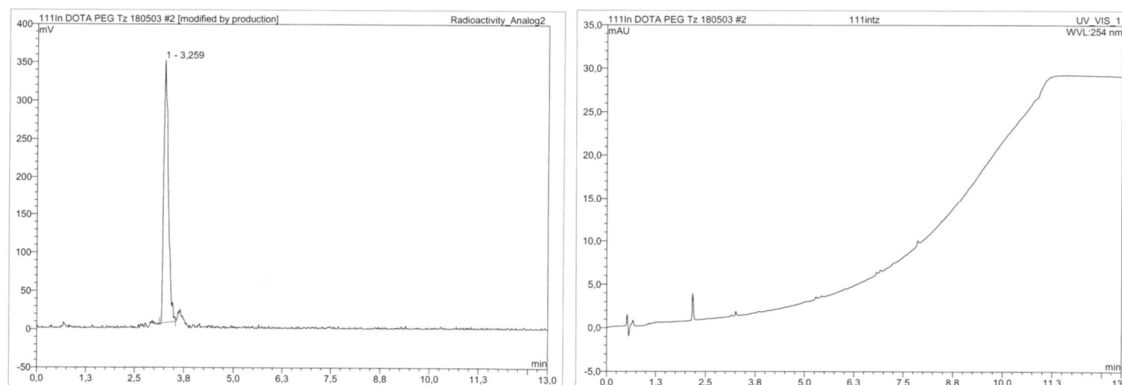

**Figure S1.** HPLC chromatograms of  $[^{111}\text{In}]2$  ( $R_t = 3.3$  min). Radiochromatogram (left) and UV-visible ( $\lambda = 254$  nm) HPLC chromatogram (right).

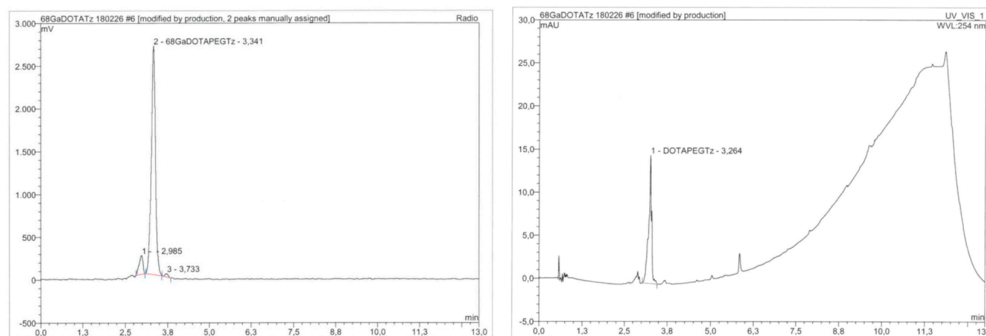

**Figure S2.** HPLC chromatograms depicting [ $^{68}\text{Ga}$ ]3 ( $R_t = 3.3$  min) in the radiochromatogram (left) and 1 ( $R_t = 3.3$  min) in the UV-visible ( $\lambda = 254$  nm) HPLC chromatogram (right).

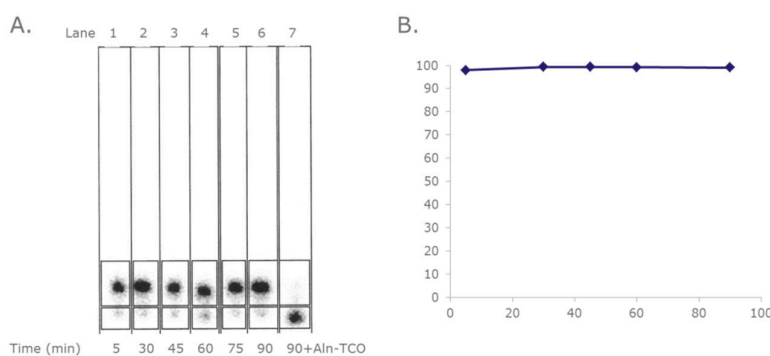

**Figure S3.** RP-radioTLC of [ $^{68}\text{Ga}$ ]3 after incubation in 10% EtOH/PBS for 5, 30, 45, 60, 75 and 90 min (lanes 1–6) and after incubation in 10% EtOH/PBS for 90 min followed by the addition of 4 in saline (lane 7) (A). In vitro stability of in 10% EtOH/PBS (B).

### Pretargeted bone imaging

|                 | Control [ $^{111}\text{In}$ ]2 (%ID/g) |             | Control [ $^{68}\text{Ga}$ ]3 (%ID/g) |
|-----------------|----------------------------------------|-------------|---------------------------------------|
|                 | SPECT 2 h                              | SPECT 22 h  | PET 2 h                               |
| <b>Shoulder</b> | 0.06 ± 0.03                            | 0.07 ± 0.03 | 0.13 ± 0.02                           |
| <b>Knee</b>     | 0.06 ± 0.03                            | 0.07 ± 0.03 | 0.4 ± 0.2                             |
| <b>Muscle</b>   | 0.2 ± 0.1                              | 0.04 ± 0.02 | 0.06 ± 0.02                           |
| <b>Heart</b>    | 0.12 ± 0.01                            | 0.04 ± 0.01 | 0.3 ± 0.1                             |

**Table S1.** Uptake values in selected tissues from SPECT scans 2 h and 22 h after injection of [ $^{111}\text{In}$ ]2 in untreated BALB/c mice ( $n = 3$ ) and from PET scans 2 h after injection of [ $^{68}\text{Ga}$ ]3 in untreated BALB/c mice ( $n = 4$ ). Data is given as mean ± standard error of mean (SEM).

### Pretargeted tumour imaging

|               | Control [ $^{111}\text{In}$ ]2 (%ID/g) |             | Control [ $^{68}\text{Ga}$ ]3 (%ID/g) |
|---------------|----------------------------------------|-------------|---------------------------------------|
|               | SPECT 2 h                              | SPECT 22 h  | PET 2 h                               |
| <b>Tumour</b> | 0.4 ± 0.1                              | 0.08 ± 0.01 | 0.19 ± 0.03                           |
| <b>Heart</b>  | 0.2 ± 0.5                              | 0.02 ± 0.03 | 0.18 ± 0.03                           |
| <b>Muscle</b> | 0.5 ± 0.3                              | 0.04 ± 0.02 | 0.17 ± 0.03                           |

**Table S2.** Uptake values from [ $^{111}\text{In}$ ]2 SPECT/CT ( $n = 3$ ) and [ $^{68}\text{Ga}$ ]3 PET/CT ( $n = 4$ ) in selected tissues in nude BALB/c mice bearing subcutaneous LS174T tumour xenografts without pre-treatment with 5. Data is given as mean ± standard error of mean (SEM).
